# Supplementary material for: Frequency analysis of air quality time series for traffic related pollutants
Source: Royal Society of Chemistry journal article supplement (doi:10.1039/b913797a), 2009-11-18
Supplement: b913797a.pdf [file b913797a.pdf]

# Frequency Analysis of Air Quality Time Series for traffic related pollutants

O. Tchepel,<sup>\*a</sup> and C. Borrego<sup>b</sup>

5

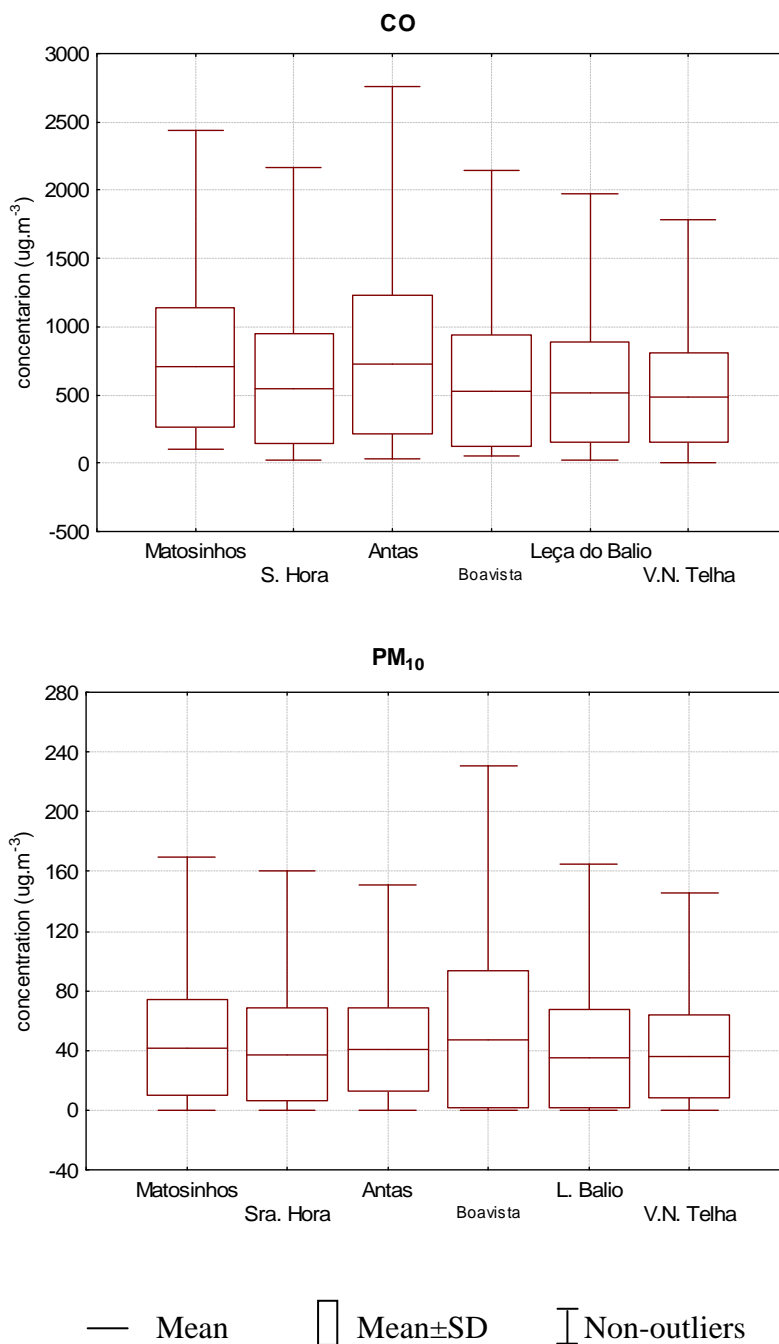

Figure 1. Box plot of the air quality measurement data for 2004

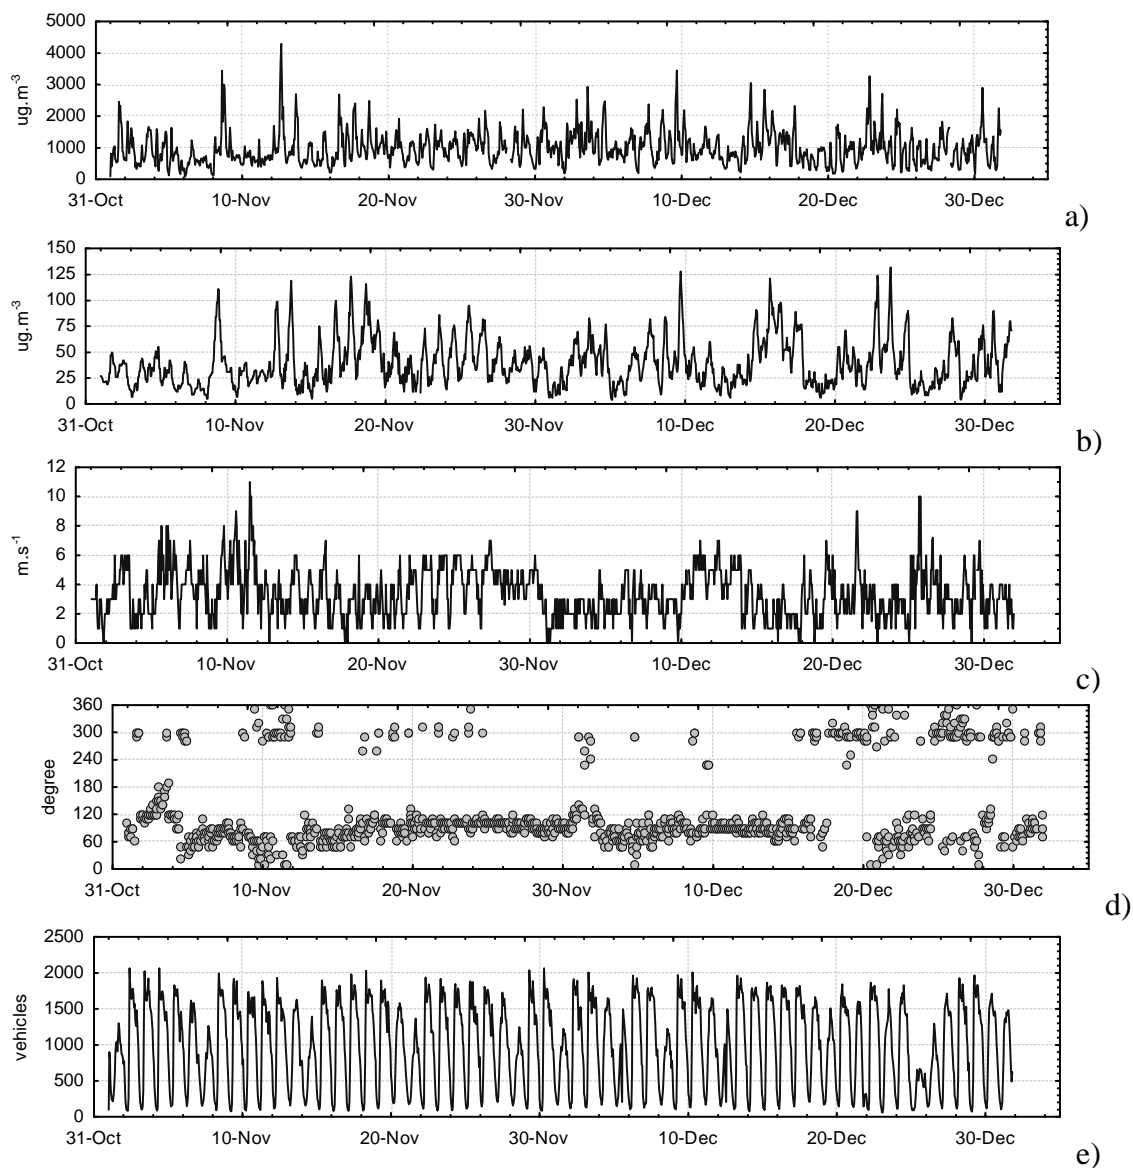

**Figure 2.** Data measured at Antas urban traffic station used in cross spectrum analysis: a) CO concentration, b)  $\text{PM}_{10}$  concentration, c) wind speed, d) wind direction and e) traffic counts.

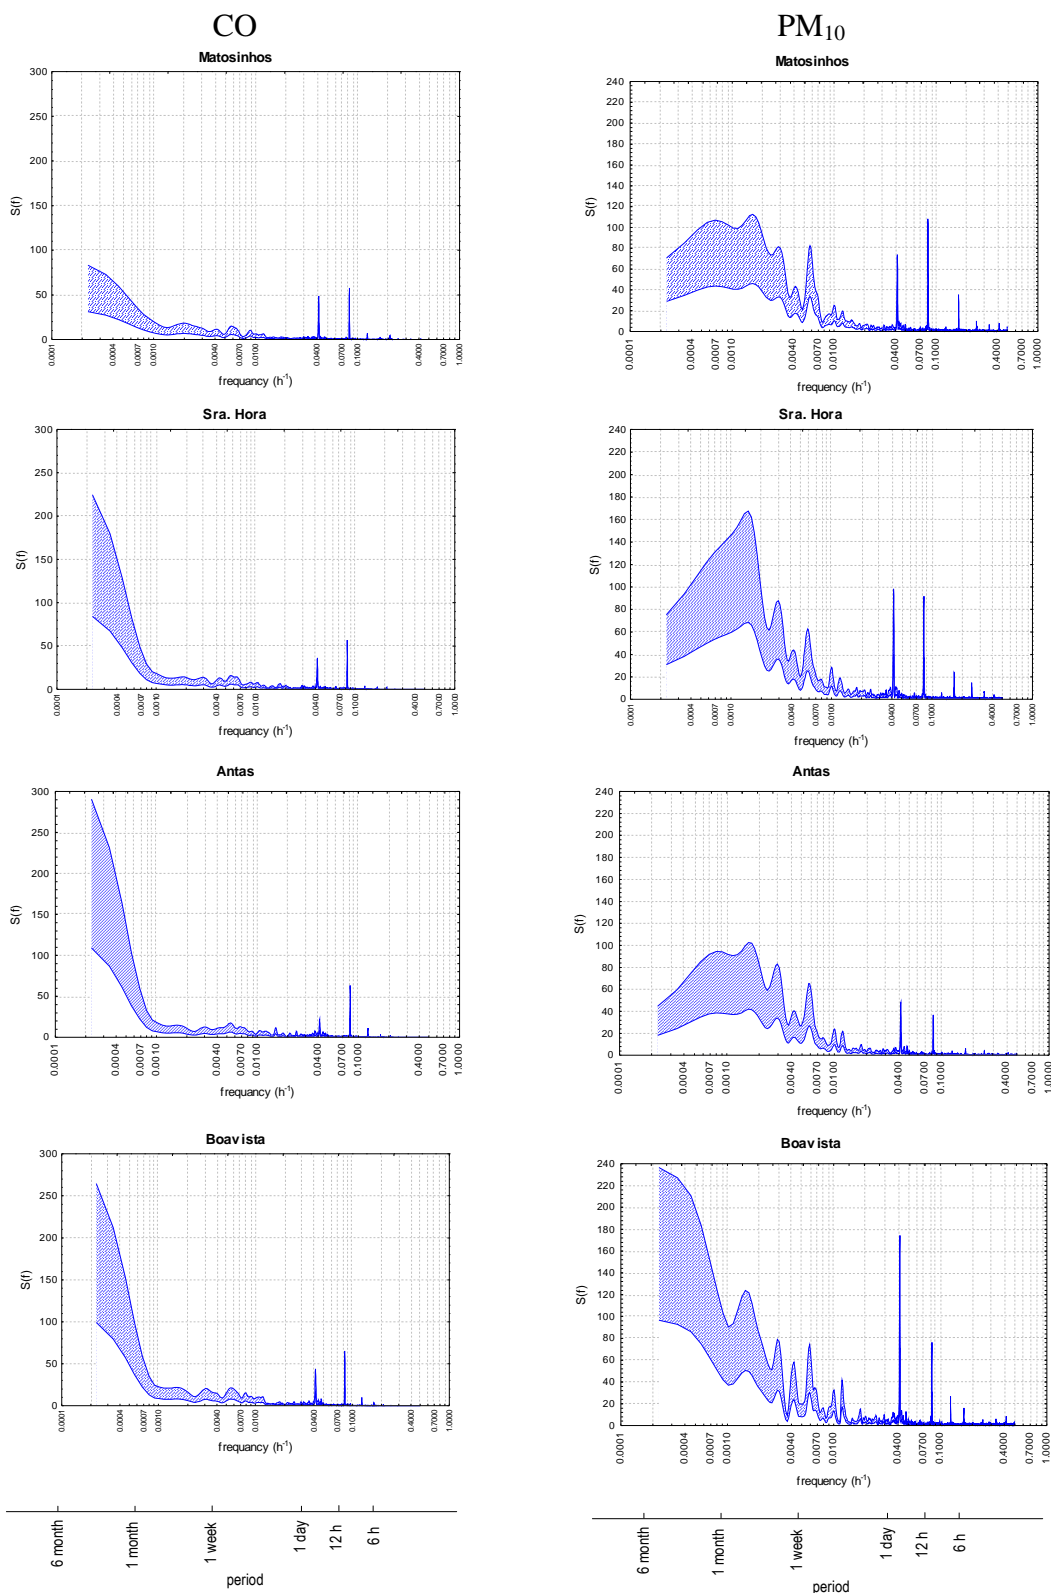

Figure 3. Power spectrum density of CO and PM<sub>10</sub> at urban traffic stations

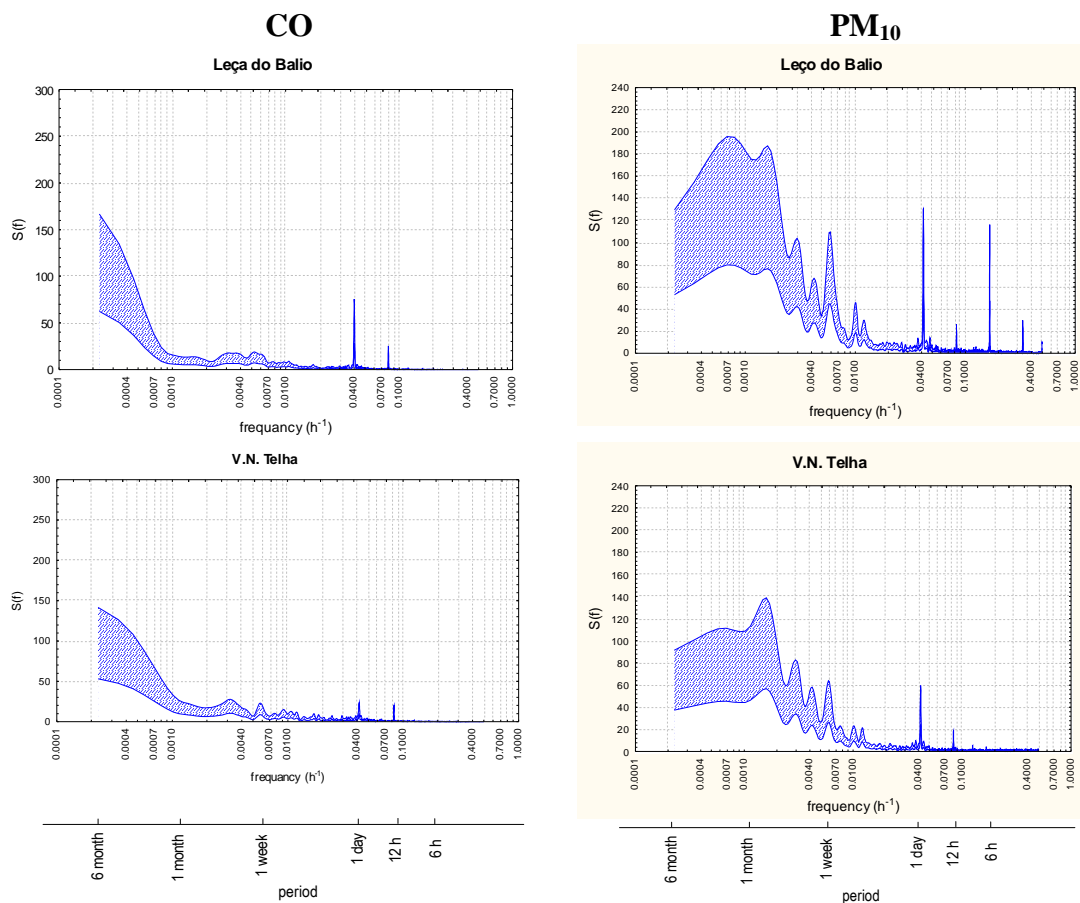

Figure 4. Power spectrum density of CO and PM<sub>10</sub> at suburban background stations

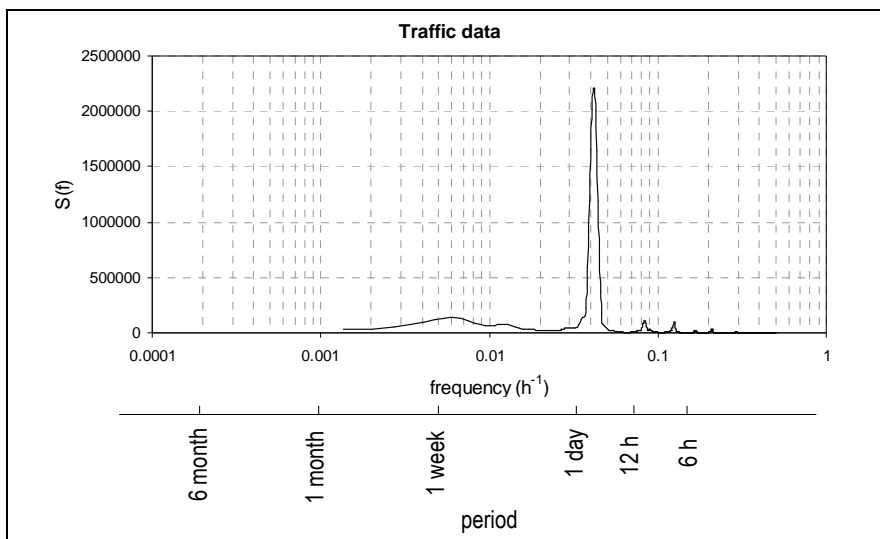

Figure 5. Power spectrum density of traffic counts

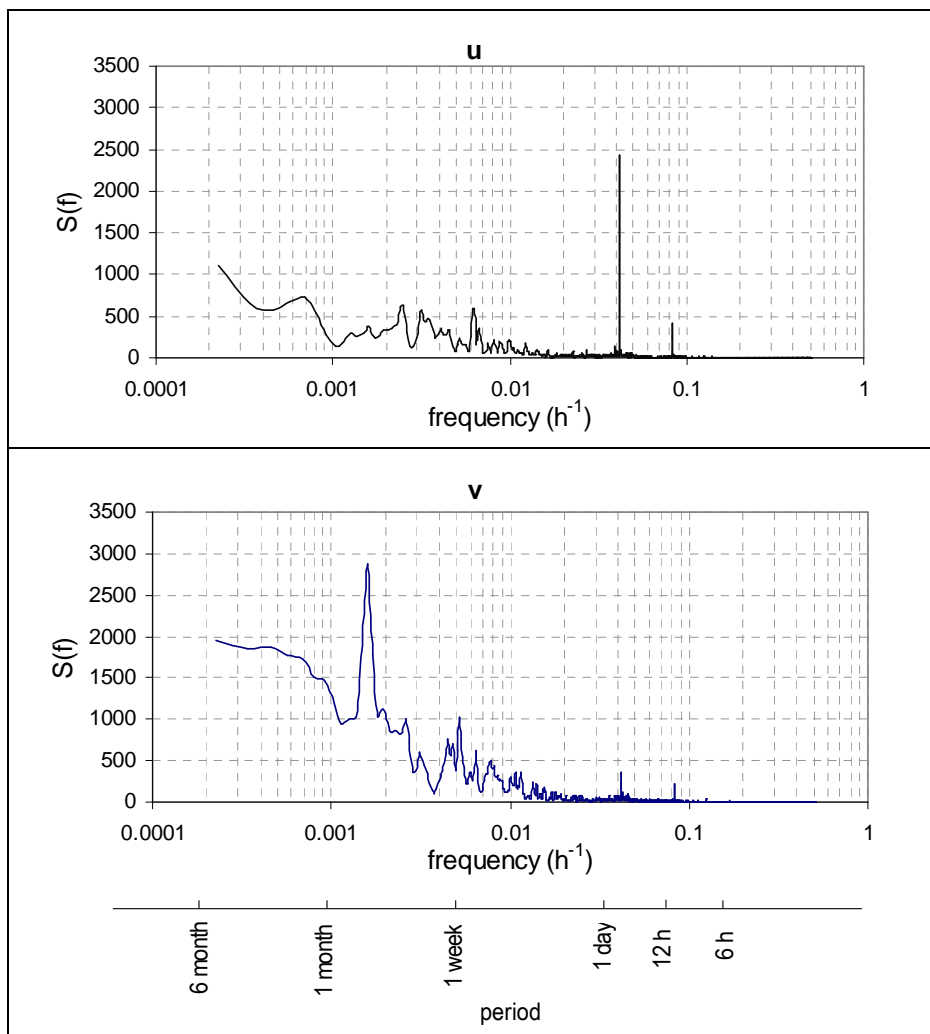

Figure 6. Power spectrum density of wind  $u$  and  $v$  components.

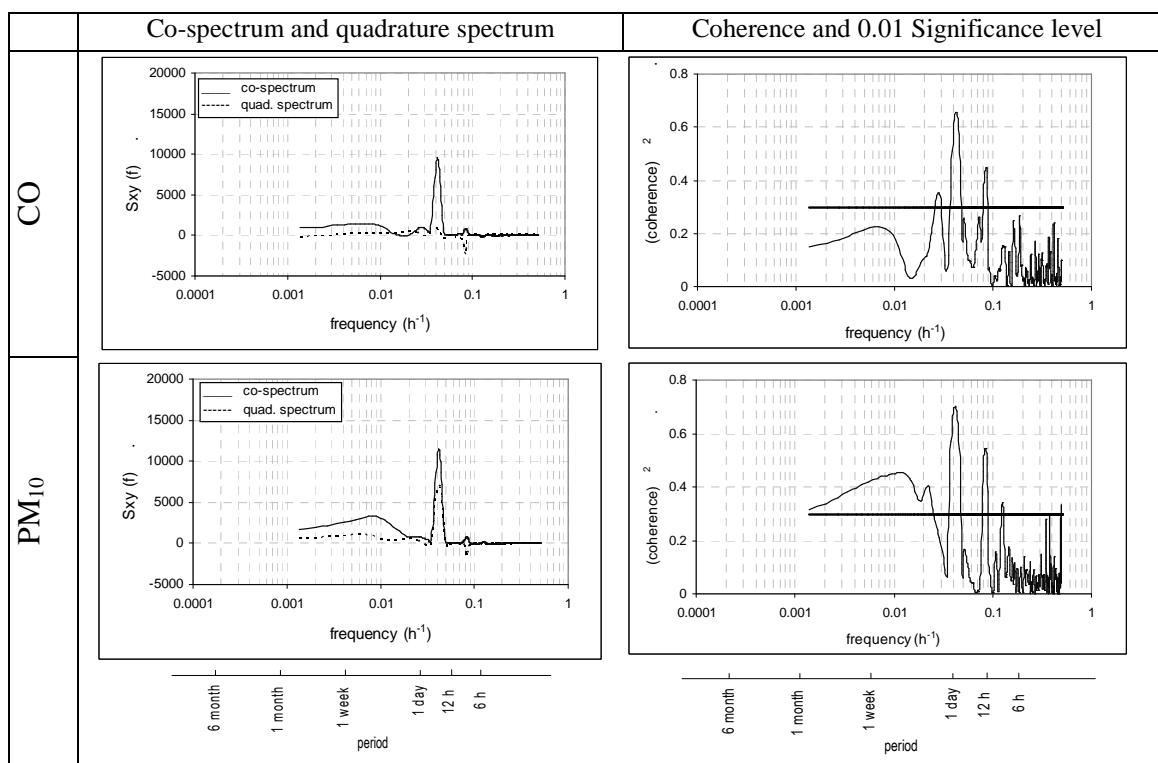

**Figure 7.** Co-spectrum, quadrature spectrum and coherency spectrum for pollutant concentrations versus traffic counts.

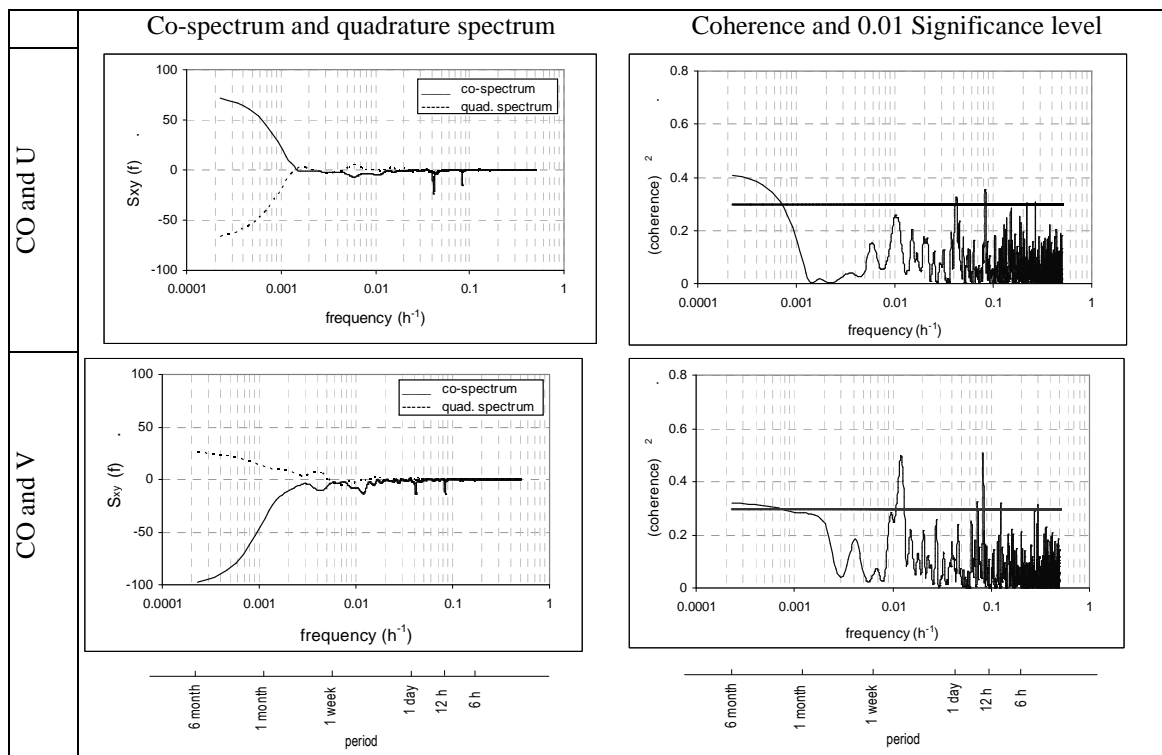

Figure 8. Co-spectrum, quadrature spectrum and coherency spectrum for CO concentrations versus wind components.



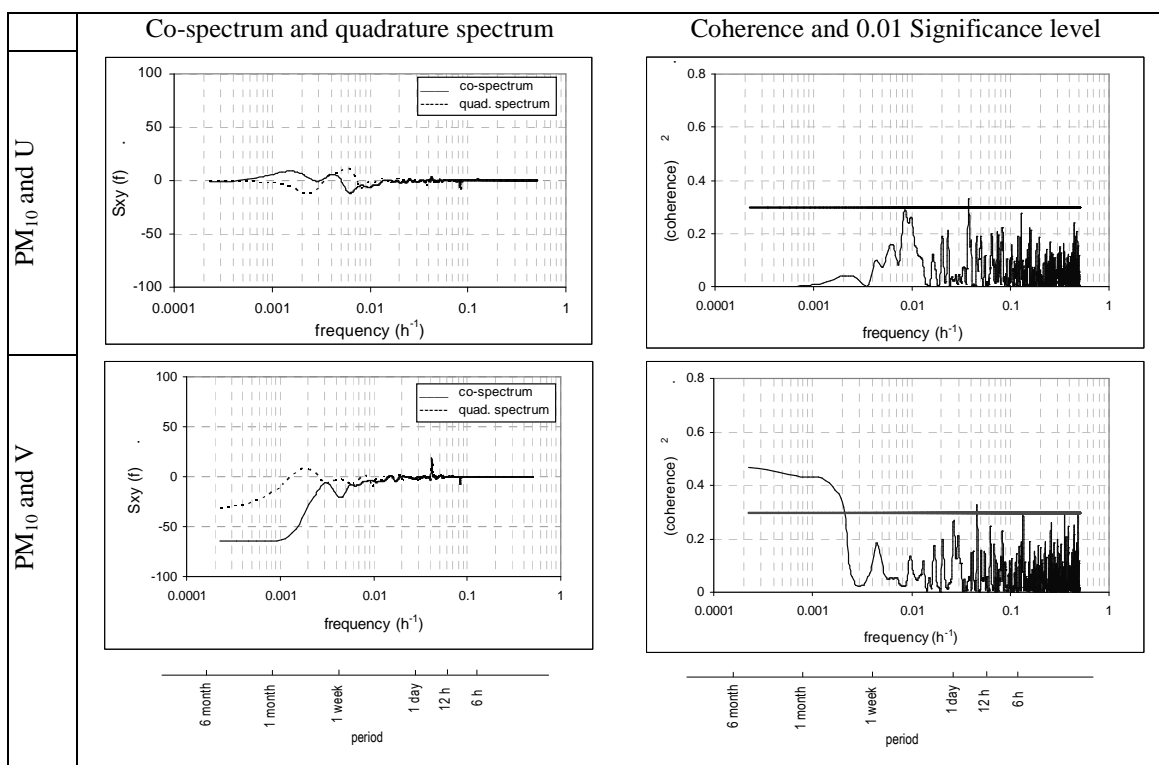

Figure 9. Co-spectrum, quadrature spectrum and coherency spectrum for PM<sub>10</sub> concentrations versus wind components.

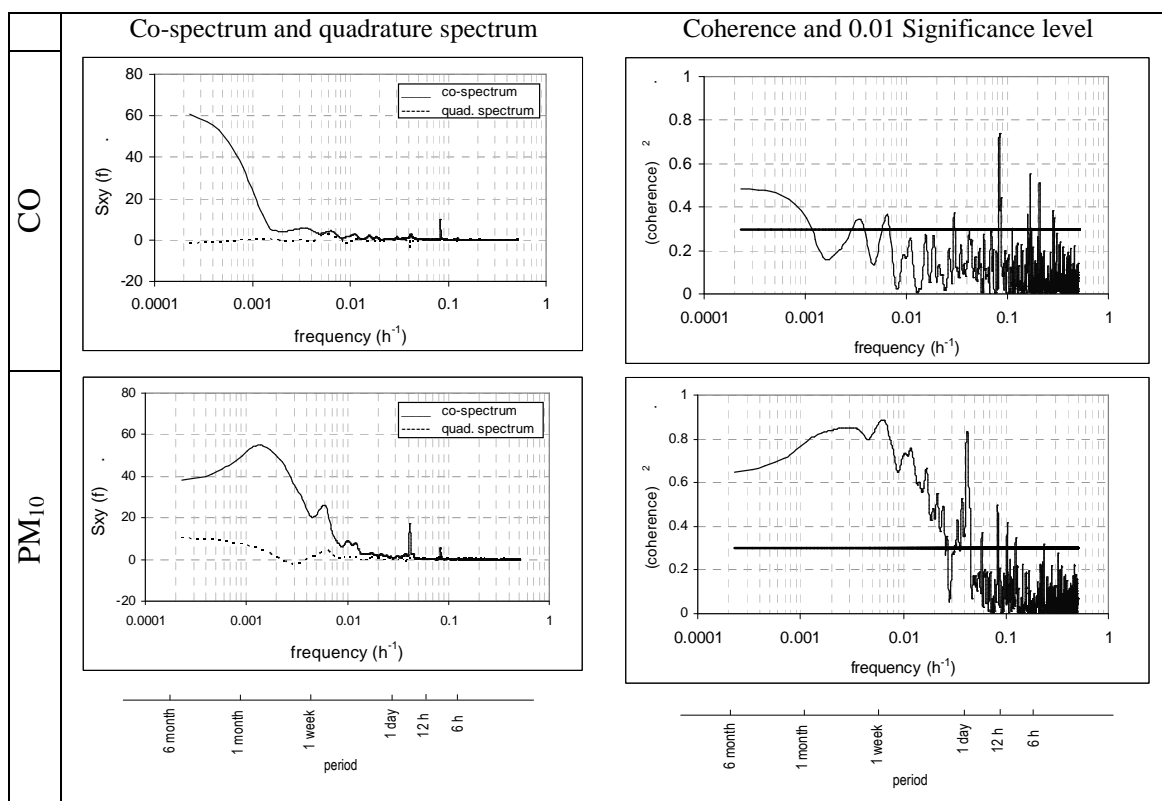

**Figure 10.** Co-spectrum, quadrature spectrum and coherency spectrum for CO and PM<sub>10</sub> concentrations: Antas urban station versus VNTelha suburban background station.
